# Supplementary material
Source: publisher figshare collection journal article supplement (https://wiley.figshare.com/ndownloader/files/33739328)
Supplement: Supplementary file 1 [file 33739328]

**Supplementary Information - Tables**

Table S1: Nominal and measured concentrations (mg a.s./kg dry soil) of neonicotinoids in LUFA 2.2 soil at different time points in toxicity tests with *Eisenia andrei* (a) and *Folsomia candida* (b)

| *a: Eisenia andrei* | | | | | | |
| --- | --- | --- | --- | --- | --- | --- |
| Nominal  concentration | t=0 days | | t= 28 days | | t= 56 days | |
| Measured  concentration | Recovery (%) | Measured concentration | Recovery (%) | Measured concentration | Recovery (%) |
| Thiamethoxam pure: Thiamethoxam + Clothianidin | | | | | | |
| 0 | <0.01 |  | * | | * | * |
| 10a | 7.3+0.0b | 73.0 | * | | 7.2 + 0.09b | 72.0 |
| Actara®: Thiamethoxam + Clothianidin | | | | | | |
| 0 | <0.01 |  | * | | * | * |
| 10a | 6.4 + 0.0b | 64.0 | * | | 5.6 + 0.09b | 56.0 |
| Acetamiprid pure: Acetamiprid | | | | | | |
| 0 | <0.01 |  | * | * | * | * |
| 0.37 | * | * | 0.026 | 7.0 | 0.013 | 3.50 |
| 1.1 | 0.65 | 59.0 | 0.05 | 5.0 | 0.021 | 2.0 |
| Mospilan®: Acetamiprid | | | | | | |
| 0 | <0.01 |  | * | * | * | * |
| 0.37 | 0.22 | 59.5 | * | * | 0 | 0.00 |
| 1.1 | 0.76 | 69.0 | 0.02 | 2.0 | 0 | 0.0 |
| Thiacloprid pure: Thiacloprid | | | | | | |
| 0 | <0.01 |  | * | * | * | * |
| 0.12 | 0.06 | 50.0 | 0 | 0.0 | 0 | 0.0 |
| 1.1 | 0.6 | 54.0 | 0.05 | 4.54 | 0.02 | 1.80 |
| 10 | 5.2 | 52.0 | 0.19 | 1.90 | 0.05 | 0.50 |

Table S1 (cont..)

| *a: Eisenia andrei* | | | | | | | | |
| --- | --- | --- | --- | --- | --- | --- | --- | --- |
| Nominal  Concentration | t=0 days | | t= 28 days | | | t= 56 days | | |
| Measured Concentration | Recovery (%) | Measured Concentration | Recovery (%) | | Measured  Concentration | Recovery (%) | |
| Calypso®: Thiacloprid | | | | | | | | |
| 0 | * | * | * | | * | * | | * |
| 0.37 | 0.35 | 94.6 | 0.04 | | 12.0 | 0.015 | | 4.00 |
| 3.3 | 3.3 | 100.0 | 0.17 | | 5.20 | 0.03 | | 0.90 |
| Confidor®: Imidacloprid | | | | | | | | |
| 0 | <0.01 |  | * | | * | * | | * |
| 0.04 | * | * | * | | * | 0.01 | | 34.0 |
| 0.12 | 0.06 | 50.0 | 0.05 | | 42.0 | 0.06 | | 50.0 |
| 3.3 | 2.10 | 63.6 | 2.20 | | 67.00 | 1.90 | | 58.0 |
| Clothianidin pure: Clothianidin | | | | | | | | |
| 0 | <0.01 |  | * | | * | * | | * |
| 0.12 | 0.07 | 58.0 | 0.04 | | 33.0 | 0.05 | | 42.0 |
| 0.37 | 0.24 | 65.0 | 0.17 | | 46.0 | 0.20 | | 54.0 |
| 3.3 | 2.30 | 70.0 | 2.10 | | 63.60 | 1.70 | | 51.5 |

*: not measured; a: also measured for clothianidin; b: concentration of clothianidin measured.

Table S1 (cont..)

| *b: Folsomia candida* | | | | |
| --- | --- | --- | --- | --- |
|  | t=0 days | | t= 28 days | |
| Nominal  Concentration | Measured Concentration | Recovery (%) | Measured Concentration | Recovery Rate (%) |
| Thiamethoxam pure: Thiamethoxam 1 | | | | |
| 0 | <0.01 |  | * | * |
| 0.12 | 0.09 | 75.0 | 0.08 | 67.0 |
| 0.37 | 0.31 | 84.0 | 0.27 | 73.0 |
| 1.12 | 0.94 | 85.6 | 0.79 | 72.0 |
| Actara®: Thiamethoxam 1 | | | | |
| 0 | <0.01 |  | * | * |
| 0.12 | 0.12 | 100 | 0.08 | 67.0 |
| 0.37 | 0.35 | 95.0 | 0.27 | 73.0 |
| 1.12 | 1.00 | 91.0 | 0.87 | 79.0 |
| Acetamiprid pure: Acetamiprid | | | | |
| 0 | <0.01 |  | * | * |
| 0.12 | 0.06 | 46.0 | 0.02 | 17.0 |
| Mospilan®: Acetamiprid | | | | |
| 0 | <0.01 |  | * | * |
| 0.37 | 0.17 | 46.0 | 0.01 | 3.0 |
| Calypso®: Thiacloprid | | | | |
| 0 | <0.01 |  | * | * |
| 0.37 | 2.6 | 79.0 | 0.06 | 1.8 |
| Confidor®: Imidacloprid | | | | |
| 0 | <0.01 |  | * | * |
| 1.12 | 0.1 | 9.0 | 0.08 | 7 |
| Clothianidin pure: Clothianidin | | | | |
| 0 | <0.01 |  | * | * |
| 0.12 | 0.07 | 58.0 | 0.05 | 42.0 |

*: not measured; 1: taken from De Lima et al. (2018).

Table S2: Control performance of *Eisenia andrei* and *Folsomia candida* in toxicity tests with neonicotinoids, pure and in commercial formulation, LUFA 2.2 soil.

|  | *Eisenia andrei1* | | | *Folsomia candida2* | | |
| --- | --- | --- | --- | --- | --- | --- |
| Neonicotinoid | Survival (%) | Mean # Juveniles per test jar | Coefficient of Variation (%) of juvenile numbers | Survival (%) | Mean # Juveniles per test jar | Coefficient of Variation (%) of juvenile numbers |
| Thiamethoxam pure | 100 | 18.8 | 10.6 | 94 | 9705 | 8.83 |
| Actara® | 100 | 61.0 | 16.4 | 90 | 737 | 10.5 |
| Acetamiprid pure | 100 | 28.0 | 11.0 | 92 | 164 | 20.3 |
| Mospilan® | 100 | 30.0 | 25.0 | 90 | 242 | 24.0 |
| Thiacloprid pure | 100 | 42.8 | 27.0 | 84 | 426 | 52.0 |
| Calypso® | 100 | 34.3 | 30.5 | 80 | 1090 | 29.0 |
| Imidacloprid pure | 100 | 60.8 | 8.2 | 98 | 662 | 15.5 |
| Confidor® | 100 | 44.3 | 11.3 | 76 | 839 | 18.0 |
| Clothianidin pure | 100 | 24.0 | 22.0 | 80 | 1064 | 14.0 |
| Validity criteria | 90 | 30 | ≤30 | 80 | 100 | ≤30 |

*1: OECD Guideline 222; 2: OECD Guideline 232.*

Table S3: Analysis of weight change of *Eisenia andrei* in tests with neonicotinoids compared to control. Also given are the derived Lowest Observed Effect Concentration (LOEC) and No Observed Effect Concentration (NOEC).

| **Neonicotinoid** | **P value** | **RSqd (%)** | **LOEC  (mg a.s./kg)** | **NOEC  (mg a.s./kg)** |
| --- | --- | --- | --- | --- |
| Thiamethoxam pure | p=0.4 | 10 | n.a | n.a |
| Actara® | p<0.05 | 34 | 10 | 3.3 |
| Acetamiprid pure | p<0.05 | 45 | 1.1 | 0.37 |
| Mospilan® | p<0.05 | 45 | 1.1 | 0.37 |
| Thiacloprid pure | p<0.05 | 78 | 10 | 3.3 |
| Calypso® | p<0.05 | 87 | 3.3 | 1.1 |
| Imidacloprid pure | p<0.05 | 50 | 0.37 | 0.12 |
| Confidor® | p<0.05 | 50 | 1.1 | 0.37 |
| Clothianidin pure | p<0.05 | 76 | 1.1 | 0.37 |

*1:LOEC: Lowest Observed Effect Concentration in relation to weight change*;*2:NOEC: No Observed Effect Concentration in relation to weight change.*
